# Supplementary material for: Association between individual retinal layer thickness and visual acuity in patients with epiretinal membrane: a pilot study
Source: PeerJ. 2020 Jul 10;8:e9481. doi: 10.7717/peerj.9481 (PMC7357566; doi:10.7717/peerj.9481)
Supplement: Supplemental Information 1 [file peerj-08-9481-s001.xlsx]

## Sheet: Sheet1
Group(Group1 ：BCVA score<0.8 and Group 2：BCVA score ≥ 0.8 ）	Patient NO	BCVA	logMAR（BCVA）	lens statue (0:lucent lens,1:(LOCS)I,2:(LOCS) II)	sex (M:male,F:Female)	age	RNFL1	RNFL3	RNFL6	GCL1	GCL3	GCL6	IPL1	IPL3	IPL6	INL1	INL3	INL6	OPL1	OPL3	OPL6	ONL1	ONL3	ONL6	PR1	PR3	PR6	Total1	Total3	Total6
1	1	0.1	1	2	M	63	242.17	168.63	67.42	109.31	63.89	34.05	27.09	45.07	67.54	105.49	98.08	64.71	33.41	38.91	34.97	168.43	184.56	173.29	41.62	39.4	44.78	765.73	678.38	521.18
1	2	0.1	1	2	M	74	51.15	164.49	63.91	63.68	80.52	35.84	29.81	36.49	47.13	49.29	92.82	73.04	31.56	40.83	31.76	161.77	150.24	101.55	44.41	39.27	34.98	734.87	643.24	425.02
1	3	0.2	0.7	1	M	65	126.65	119.53	109.02	71.26	53.57	30.31	47.12	50.09	39.74	114	88.54	57.38	34.05	35.04	33.62	180.9	154.12	112.46	50.48	39.38	35.57	655.91	572.91	452.92
1	4	0.5	0.30103	0	M	53	25.18	36.8075	51.0525	34.88	50.5775	23.115	64.78	40.6875	27.4675	47.39	37.38	21.035	38.32	34.77	24.125	65.58	74.1475	72.56	33.57	30.82	38.9725	336.92	333.947	295.245
1	5	0.1	1	1	M	69	8.38	26.45	43.81	44	58.2	34.95	40.13	42.03	36.06	43.55	52.59	36.01	41.65	29.17	23.37	107.97	104.06	86.49	35.5	34.23	33.16	347.93	378.22	322.3
1	6	0.1	1	1	M	70	148.46	90.12	96.23	105.75	93.91	39.42	38.76	66.49	59.66	87.25	94.68	68.41	37.64	34.84	30.38	122.87	97.07	89.8	33.46	32.1	34.97	611.97	541.75	451.58
1	7	0.6	0.221849	0	M	64	33.79	35.4075	49.7525	17.9	66.055	37.1775	37.81	41.1125	38.475	19.78	48.1425	35.4625	27.72	31.2775	26.3025	117.46	88.475	73.1825	32.44	28.945	31.2075	328.13	374.113	320.005
1	8	0.1	1	1	M	60	56.9	81.15	97.48	74.38	71.17	41.56	78.32	71.27	49.39	86.36	82.39	64.98	29.05	32.06	30.93	141.45	138.75	103.13	40.66	40.88	33.87	549.63	559.33	455.18
1	9	0.5	0.30103	2	M	78	1.83	23.5025	41.9775	7.69	45.08	34.015	16.57	35.9225	37.65	14.9	41.0475	37.145	17.9	33.9475	29.3	106.75	80.29	71.7575	28.12	23.5825	27.515	235.06	321.01	307.815
1	10	0.5	0.3	2	M	69	65.63	39.32	44.94	14.22	46.68	24.26	39.64	53.79	37.44	27.33	60.3	34.82	31.26	27.8	26.4	123.72	104.8	76.38	34.92	28.41	29.96	378.75	404.28	308.74
1	11	0.4	0.4	0	M	55	18.4	47.61	76.27	87.41	50.69	29.96	52.12	83.69	41.39	102.04	82.46	44.54	30.84	31.82	29.36	119.16	92.98	75.6	33.78	26.92	28.54	484.53	451.68	351.66
1	12	0.4	0.4	1	M	67	14.7	46.53	53.51	91.18	54.74	24.98	58.12	64.65	44.41	78.91	71.63	42.16	32.63	33.64	36.5	130.69	119.12	78.66	33.74	29.56	30.87	477.13	438.06	344.95
1	13	0.4	0.4	1	M	71	18.76	34.45	47.68	40.01	46.86	30.67	60.17	56.89	41.5	55.92	53	39.19	30.8	31.87	28.62	112.13	86.35	71.91	38.24	33.97	33.55	382.95	373.97	324.37
1	14	0.6	0.221849	2	M	60	10.01	40.125	51.2975	60.79	74.6275	32.28	34.08	39.195	39.105	40.85	47.9825	34.695	30.11	28.04	30.73	130.92	82.3525	61.3225	32.28	28.805	29.29	374.75	370.717	305.035
1	15	0.4	0.4	0	M	60	8.16	40.07	63.39	58.59	82.07	43.14	42.85	44.28	40.73	58.85	74.86	40.29	42.31	31.57	32.53	116.3	90.71	73.51	28.7	23.8	27.82	387.83	413.15	348.3
1	16	0.6	0.221849	0	M	60	8.16	40.0675	63.39	58.59	82.07	43.1375	42.85	44.275	40.7275	58.85	54.8625	40.285	42.31	31.565	32.525	116.3	90.7125	73.5125	28.7	23.8	27.8175	387.83	393.147	348.295
1	17	0.5	0.30103	1	M	59	11.98	37.2025	47.545	105.76	82.155	29.99	31.63	36.7375	33.0025	62.95	55.6775	34.9225	35.61	32.9075	26.0475	131.59	102.32	80.2925	32.87	29.3825	27.9825	446.89	407.788	305.092
1	18	0.5	0.30103	1	M	51	29.7	29.495	47.7025	82.42	69.3225	31.5575	28.11	36.775	34.925	45.59	48.5175	33.565	48.61	42.1825	29.365	101.35	89.1775	78.3375	34.39	32.1425	30.4875	399.86	374.358	311.695
1	19	0.4	0.4	1	F	63	61.86	62.58	71.15	86.91	86.78	49.75	42.14	37.82	36.49	90.29	85.87	45.8	36.08	29.87	29.17	147.56	106.84	79.05	35.77	33.13	31.02	542.9	478.64	357.15
1	20	0.2	0.69897	2	F	53	103.22	83.13	48.695	45.51	48.79	25.7175	80.46	57.55	36.1675	83.12	77.6625	38.75	28.78	29.185	27.555	108.35	98.8225	76.0475	39.71	32.625	30.895	522.22	463.132	312.935
1	21	0.4	0.39794	2	M	67	36.89	37.1275	51.6075	15.07	58.0325	38.9425	17.74	38.2575	38.4575	14.77	48.2175	35.3875	25.5	27.0375	24.3525	99.96	97.8125	73.3525	41.05	38.855	34.03	280.06	377.873	322.688
1	22	0.5	0.30103	0	M	65	15.61	34.5075	48.745	9.33	48.02	30.3675	18.84	39.4075	36.485	13.69	41.78	31.685	26.4	36.265	29.81	107.53	85.05	61.88	32.45	24.37	27.735	269.92	351.67	298.603
1	23	0.5	0.3	1	M	67	51.57	51.17	70.65	72.56	58.37	39.39	40.37	42.03	34.95	83.7	61.55	32.9	31.21	29.28	23.87	81.17	83.31	69.05	29.63	30.11	30.24	419.73	394.32	326.24
1	24	0.5	0.3	1	F	71	54.53	31.14	46.75	10.87	30.69	21.27	49.4	55.65	36.33	36.63	61.04	39.13	28.74	31.44	36.44	127.21	82.27	69.51	51.72	42.01	35.18	380.6	365.81	312.07
1	25	0.1	1	2	F	70	97.93	64.54	50.17	77.83	48.12	24.12	62.06	56.32	41.11	117.18	86.95	38.88	28.5	32.63	28.94	116.52	112.2	82.76	25.89	28.53	28.04	557.38	459.72	322.89
1	26	0.6	0.22	0	M	65	19.96	48.93	62.08	97.72	85.47	39.64	36.64	43.22	40.44	69.57	59.16	44	48.8	41.5	33.58	117.38	97.94	85.61	37.28	35.21	32.88	459.95	442.19	367.67
1	27	0.3	0.522879	1	M	78	14.96	35.9325	51.24	27	46.77	34.3325	117.31	87.395	46.815	74.56	67.4	42.06	29.12	31.755	31.3225	150.3	105.89	77.5375	32.65	30.05	30.0575	491.33	443.262	344.505
1	28	0.7	0.15	0	M	61	53.34	74.17	61.97	80.47	65.84	29.85	35.86	43.83	37.09	47.05	64.81	35.42	45.27	35.8	28.91	116.87	88.15	69.17	33.58	29.93	30.8	452.49	440.29	322.54
1	29	0.6	0.221849	1	F	63	21.77	27.8475	48.82	9.37	30.435	33.0125	50.49	55.4375	44.26	34.17	44.815	42.56	12.63	30.6525	29.8175	155.31	110.108	78.3625	27.8	30.0325	29.845	351.12	364.533	337.02
1	30	0.4	0.39794	1	M	56	31.38	48.39	41.5925	81.07	64.75	30.1975	36.27	39.09	32.9625	63.97	58.8125	35.135	35.76	34.225	28.2475	129.13	91.195	70.7325	36.77	29.4275	29.82	443.1	398.685	298.535
1	31	0.1	1	2	M	54	31.2	47.6975	52.5	23.74	52.2925	31.0725	38.56	43.415	38.0725	31.59	46.15	36.16	22.71	35.215	27.1	111.71	76.82	63.405	33	28.72	30.1175	318.41	355.885	305.84
1	32	0.5	0.30103	2	M	67	41.7	56.8225	40.615	11.05	36.245	22.0425	35.4	63.6925	37.4525	18.04	61.8175	34.4425	30.76	32.61	26.3975	178.98	133.373	86.7725	47.96	31.7775	30.5225	399.23	453.17	307.962
1	33	0.3	0.522879	1	F	56	21.33	35.48	58.765	26.3	59.885	36.865	27.88	31.9975	32.685	30.14	44.32	37.785	11.97	27.4525	30.155	120.73	92.56	77.185	46.17	33.4075	31.6775	311.29	351.377	265.493
1	34	0.3	0.522879	2	M	50	114.03	130.045	64.94	31.35	35.9075	27.905	30.97	32.1475	30.54	48.2	72.2825	45.7325	59.8	41.4325	30.6525	177.68	130.822	96.5625	34.44	27.3	29.8675	536.15	510.962	357.733
1	35	0.08	1.09691	2	F	57	10.62	23.45	33.58	31.49	28.2725	23.275	64.83	64.295	47.8075	91.6	84.29	49.7425	28.6	34.69	30.3225	133.88	110.112	83.04	41.64	37.7875	32.61	436.67	413.63	328.955
1	36	0.5	0.30103	0	M	52	69.06	46.9225	43.1625	28.32	65.895	30.915	34.71	37.2925	33.39	21.12	50.8425	34.2675	35.82	31.9675	27.295	112.19	102.72	84.53	42.52	38.48	36.6275	381.33	407.365	320.87
1	37	0.5	0.3	1	M	61	17.78	41.87	59.28	45.43	52.38	30.95	68.6	58.36	45.65	57	56.32	39.46	39.82	30.78	27.35	128.36	106.96	86.82	35.52	27.76	30.12	436.11	414.1	352.42
1	38	0.2	0.69897	2	M	65	142	88.0225	71.305	68.08	73.7325	39.215	45.02	48.23	38.8375	76.93	81.7525	51.5125	30.17	31.94	28.0075	161.35	126.715	99.8125	39.77	34.025	32.795	591.09	1650.16	390.913
1	39	0.6	0.221849	0	M	64	9.94	31.8325	49.805	45.77	53.025	31.035	54.57	44.55	32.9025	51.95	46.7375	30.9425	28.51	29.2325	27.5875	129.42	90.025	69.2475	40.06	30.6575	30.43	393.46	360.673	303.54
1	40	0.2	0.69897	2	M	56	81.94	73.2975	53.5075	84.51	64.0825	23.8825	69.54	55.755	34.8225	101.58	92.7675	44.63	35.2	34.45	28.485	121.13	104.235	89.69	38.05	34.8325	36.5475	563.57	492.84	344.04
1	41	0.3	0.52	1	F	53	169.63	133.47	73.19	94.15	53.89	21	31.33	37.64	35.89	104.92	105.59	69.42	36.87	39.96	28.84	122.41	124.14	101.91	33.36	34.06	32.93	625.78	564.06	399.46
1	42	0.1	1	2	F	70	143.99	100.99	28.03	85.84	64.31	30.04	35.52	41.65	58.88	96.94	73.34	64.52	34	45.7	34.75	125.45	133.86	111.71	33.99	34.61	34.93	599.03	504.92	392.2
1	43	0.2	0.69897	2	F	68	35.56	49.4175	44.7425	34.77	37.7375	28.6425	119.18	92.885	45.67	69.74	60.25	51.03	58.63	59.07	30.9775	159.1	131.062	87.3125	32.02	25.525	30.695	543.07	503.42	350.395
1	44	0.6	0.221849	0	F	55	3.92	25.645	40.3325	16.88	59.82	33.7675	24.42	35.375	36	23.75	39.0675	30.125	12.93	28.0575	26.04	133.48	91	74.7425	35.91	30.8625	31.35	291.63	346.053	303.195
1	45	0.6	0.221849	0	F	55	69.6	38.0525	49.3025	26.96	67.0025	33.11	44.67	43.3975	37.105	22.13	45.3575	31.2725	37.81	35.2625	25.655	105.83	84.0625	72.0225	33.02	28.16	28.205	382.59	379.767	309.642
1	46	0.4	0.39794	1	M	71	119.49	73.015	41.865	24.84	47.68	32.0275	41.41	45.5	36.535	40.75	51.8175	35.0025	33.36	31.88	31.9075	121.56	80.8325	69.28	34.45	30.5325	31.545	460.06	415.65	306.36
1	47	0.5	0.30103	1	M	70	38.61	43.95	48.4025	28.25	32.035	21.0275	47.5	35.9125	32.0725	46.71	48.5925	32.5775	40.01	31.31	27.0925	113.5	96.2725	70.3325	34.46	29.92	31.5125	388.93	350.427	290.392
1	48	0.1	1	2	F	54	19.59	36.01	56.2725	76.93	75.1	32.855	29.42	34.065	37.3475	51.56	44.0925	32.5	49.13	41.06	29.1625	88.01	89.48	80.6275	42.12	33.65	30.8	389.27	382.637	328.402
1	49	0.1	1	2	M	59	137.9	105.642	97.5325	41.21	44.59	33.785	44.19	59.045	52.115	67.81	101.98	74.75	40.71	32.89	27.9475	165.27	131.637	101.395	35.57	30.6775	30.945	569.68	548.207	451.423
1	50	0.7	0.154902	0	F	71	62.07	71.9475	70.9025	101.88	85.8775	36.8175	29.28	38.3275	39.105	81.6	75.2675	44.9	36.65	33.035	33.1675	146.71	123.493	102.308	35.94	31.125	31.5175	530.34	497.9	389.678
1	51	0.6	0.221849	1	F	71	163.13	105.31	64.52	78.11	58.8	32.6475	30.79	45.375	40.85	82.06	79.275	44.56	29.38	31.765	31.47	121.6	121.7	103.69	33.83	29.8425	32.7125	577.24	521.327	381.192
1	52	0.3	0.522879	1	M	58	16.3	41.32	57.9975	76.29	76.54	35.95	36.87	47.5	42.6025	54.63	55.9825	38.255	39.03	36.3075	31.85	127.67	86.8575	74.52	37.72	28.705	29.66	425.24	412.71	344.228
1	53	0.1	1	2	M	63	294.21	132.083	85.6125	95.99	74.8725	35.0225	29.86	46.54	47.285	54.82	102.05	55.1425	28.33	38.9775	29.4025	140.02	143.89	116.213	41.8	41.42	37.8375	721.73	603.007	433.137
1	54	0.7	0.154902	2	M	64	12.13	53.3075	68.5225	35.65	42.7575	30.2275	95.78	88.595	46.1075	70.72	64.2725	40.9925	41.31	31.82	31.6125	145.42	80.65	76.505	43	33.0875	31.2725	478.84	453.64	353.082
1	55	0.6	0.221849	1	F	53	15.92	32.7225	46.905	74.42	58.6225	28.965	30.36	29.1825	36.23	40.34	45.3925	31.995	23.09	30.785	27.2925	121.32	84.595	73.11	28.69	27.0725	28.195	371.25	346.727	304.993
1	56	0.6	0.221849	1	M	67	85.76	59.8525	45.0375	43.9	42.69	27.285	41.42	39.765	34.235	37.65	42.215	30.7775	32.23	29.82	27.0225	90.28	81.4725	68.3	36.17	32.5175	31.0375	407.92	352.287	294.005
1	57	0.4	0.39794	2	F	66	32.56	59.7	64.5825	98.74	80.77	30.3325	48.49	42.42	37.8167	73.01	62.14	37.39	32.26	33.19	30.63	131.21	96.3625	71.1475	35.07	33.2075	33.3075	491.5	446.343	334.425
1	58	0.5	0.30103	0	F	54	12.47	15.205	30.2075	17.24	30.455	35.8925	23.72	33.895	35.1825	12.53	32.8725	30.4975	12.53	32.8725	30.4975	111.46	77.4275	76.34	33.26	33.9975	33.09	250.85	274.7	283.76
1	59	0.2	0.69897	2	F	79	16.31	42.485	59.085	67.2	55.905	23.6775	53.21	55.27	38.8275	116.37	91.8925	37.54	40.23	36.015	25.095	159.6	118.612	79.2325	35.82	35.625	32.2775	525.37	479.873	324.75
1	60	0.6	0.221849	1	F	64	28.28	38.12	37.3475	17.27	45.8875	23.81	21.57	30.195	30.7275	23.56	36.105	26.505	23.87	33.815	26.255	93.93	60.595	59.6175	33.81	30.4825	28.3075	275.16	299.67	260.59
1	61	0.2	0.69897	2	F	64	13.77	25.29	44.1625	33.2	34.6775	20.105	39.93	41.755	28.6725	35.38	42.16	27.1975	32.91	27.8775	23.8025	104.17	76.41	58.8625	34.02	29.52	30.9025	322.53	298.363	263.04
1	62	0.2	0.7	2	M	63	263.8	172.48	83.59	59.71	63.85	33.04	26.28	34.58	38.55	102.44	98.2	57.68	38.76	35.51	28.33	145.39	129.79	103.67	37.01	35.58	34.23	705.69	604.64	407.7
1	63	0.2	0.7	2	F	68	59.37	42.55	56.75	42.56	44.7	24.41	51.83	61.68	36.17	97.39	86.38	39.4	35.08	29.97	30.69	135.77	109.14	83.16	35.47	30.24	34.1	490.55	438.03	333.43
1	64	0.4	0.39794	1	F	68	23.55	37.9025	56.7225	67.91	60.705	27.15	48.72	45.29	37.085	67.24	54.71	33.76	35.66	30.3925	31.2975	132.23	103.203	74.7875	28.22	28.54	33.465	444.85	395.023	326.413
1	65	0.4	0.39794	1	M	60	7.65	20.4375	24.0675	31.09	37.7775	23.44	29.47	32.625	29.3075	37.07	48.1275	35.26	30.74	35.8	29.05	117.5	79.0525	58.555	39.91	32.145	28.6225	319.59	322.157	252.968
1	66	0.1	1	2	F	68	33.03	52.9725	48.0625	133.46	85.8925	33.1925	32.61	35.375	34.4075	69.29	46.905	35.565	30.75	30.4425	28.935	83.65	86.5775	72.23	31.94	31.2375	31.73	439.75	414.123	316.515
1	67	0.3	0.52	2	F	55	49.71	60.8	107.73	31.29	50.73	39.83	50.47	63.06	49.97	123.29	117.17	92.66	37.95	39.01	33.88	185.75	139.48	122.72	42.38	35.78	35.93	554.95	524.41	517.25
1	68	0.4	0.39794	1	M	64	33.91	33.46	36.5275	28.13	45.5875	27.4975	20.27	35.315	34.4375	30.53	39.7475	30.1	14.35	28.36	26.1325	142.92	91.27	76.7275	38.42	34.2925	28.9475	338.12	334.8	290.35
1	69	0.4	0.39794	1	F	54	156.61	110.91	77.8175	58.03	66.4	32.9175	51.19	48.405	40.335	60	59.685	39.61	39.91	31.7475	32.44	185.19	125.138	95.85	35.72	31.11	33.4725	622.55	443.39	380.455
1	70	0.3	0.522879	1	F	62	158.55	78.58	60.305	28.06	75.12	33.6325	38.13	46.3125	41.8675	25.84	60.9325	39.8625	27.55	33.4475	29.1975	167.89	114.332	86.82	37.54	30	27.09	534.06	480.387	354.95
1	71	0.4	0.39794	1	F	61	8.97	11.6425	17.6875	16.33	36.3575	32.44	25.78	28.3625	31.985	29.43	44.9125	38.355	34	32.56	30.4675	111.83	88.285	66.915	34.97	29.355	29.29	296.7	306.27	280.673
1	72	0.3	0.52	2	M	65	43.65	51.73	50.21	23.67	38.8	26.98	29.28	38.33	39.11	81.6	75.27	44.9	36.65	33.04	33.17	146.71	123.49	102.31	35.94	31.13	31.52	530.34	497.9	389.68
1	73	0.4	0.4	2	F	64	57.32	59.88	53.16	84.36	70.44	32.88	40.59	42.65	43.74	78.26	93.52	68.53	42.91	37.43	31.13	127.87	126.36	104.58	37.46	38.24	35.98	498.18	495.39	398.38
1	74	0.4	0.4	1	F	54	12.47	15.21	30.21	17.24	30.46	35.89	23.72	33.9	35.18	12.53	32.87	30.5	12.53	32.87	30.5	111.46	77.43	76.34	33.26	34	33.09	250.85	274.7	283.76
1	75	0.1	1	2	F	53	110.61	44.41	53.55	75.67	54.81	29.15	34.04	39.33	31.9	119.86	98.55	51.21	35.46	36.1	28.23	123.93	106.76	88.22	36.1	30.45	25.11	564.14	429.63	337.02
1	76	0.7	0.52	0	M	56	142	88.02	71.31	86.78	63.45	39.22	24.36	31.28	38.84	56.93	81.75	51.51	30.17	31.94	28.01	161.35	126.72	99.81	39.77	34.03	32.8	571.09	650.16	390.91
1	77	0.3	0.15	0	M	63	29.53	27.99	48.14	69.74	67.39	37.62	26.75	36.93	37.75	50.81	52.51	39.9	33.79	28.65	25.14	95.41	97.06	88.35	39.46	30.98	30.76	373.24	373.5	340.71
2	78	1	0	0	F	62	8.67	36.6625	59.085	56.13	58.825	26.1	69.06	56.01	37.5875	52.68	53.2975	32.825	28.7	29.155	30.3425	145.27	101.832	74.8525	33.58	30.69	32.2	429.46	398.498	320.37
2	79	0.9	0.0457575	1	F	52	12.96	27.3225	35.835	36.84	56.405	27.115	34.87	36.99	31.7525	45.04	44.7025	29.94	24.8	25.565	24.36	123.34	97.68	78.935	28.8	21.4	28.6075	347.9	350.803	286.055
2	80	0.9	0.0457575	0	M	59	30.33	41.5525	37.1775	36.83	51.4	28.3425	31.9	34.21	34.8725	39.7	46.5825	32.9925	33.42	26.5175	23.2075	147.42	97.765	68.8575	31.11	25.77	26.4525	384.98	358.382	283.012
2	81	0.9	0.0457575	1	M	63	8.18	31.62	55.0025	53.49	69.675	35.515	32.08	40.6875	37.45	34.01	40.6625	32.205	35.4	30.95	26.775	116.77	84.63	72.1825	34.91	27.945	30.86	354.62	362.173	320.152
2	82	0.9	0.0457575	1	M	57	6.9	30.7325	44.4575	46.29	64.6025	32.3575	37.24	35.295	32.2825	45.98	51.085	34.8825	30.28	26.9925	25.32	133.5	100.558	77.1625	32.87	26.025	28.405	369.39	368.42	299.84
2	83	0.8	0.09691	2	F	58	6.44	30.2025	49.96	33.02	55.54	29.37	22.84	34.775	34.3625	29.8	39.53	30.1825	8.51	25.77	25.1525	143.1	95.01	75.2625	32.38	24.155	26.67	310	337.543	299.71
2	84	0.8	0.09691	1	M	72	14.11	36.5275	48.9925	32.45	41.855	29.14	39.76	54.4175	40.565	34.27	43.18	33.5875	39.26	35.3025	30.4775	116.69	88.3925	64.28	32.55	29.3525	31.455	351.43	365.415	306.73
2	85	1	0	1	F	61	8.74	29.5075	39.2475	54.55	61.7325	36.3425	39.53	41.695	38.7225	42.27	44.825	31.86	32.82	33.165	28.2725	119.7	81.25	65.1075	32.4	28.635	32.2925	377.54	360.6	299.955
2	86	0.8	0.09691	2	M	65	8.12	27.8975	40.795	15.99	54.035	32.88	18.97	36.5375	34.185	19.62	39.475	30.9525	18	34.495	27.71	108.37	83.2175	74	35.8	30.66	28.19	258.43	335.212	294.348
2	87	0.9	0.0457575	2	M	65	102.72	71.2025	67.23	53.26	50.8625	26.5475	59.34	61.8575	40.78	67.86	61.52	33.77	36.93	33.265	30.1775	100.24	86.2175	68.5325	30.85	30.165	31.8375	492.96	431.735	327.562
2	88	1	0	0	M	65	9.78	29.2875	42.035	33.35	60.7575	33.8625	17.84	36.1925	38.4725	30.53	39.3625	31.9325	12.73	27.985	25.6325	133.58	83.6125	67.5275	32.75	25.1125	25.9925	316.22	344.377	299.702
2	89	0.9	0.0457575	0	M	51	47.13	52.2075	41.07	9.85	42.3075	22.6675	29.37	38.3425	31.4875	14.81	55.745	36.4425	41.1	32.19	30.0875	116.5	101.022	75.7675	34.84	27.3125	28.595	332.48	389.065	299.155
2	90	0.9	0.0457575	1	F	57	43.21	26.8	40.0975	19.37	56.1925	28.3325	29.19	36.58	34.375	21.57	41.6125	28.565	28.2	26.2725	23.9575	89.09	85.375	74.6975	30.18	31.68	34.83	302.46	337.87	292.44
2	91	1	0	1	M	67	10.84	35.045	51.025	11.94	40.81	20.7375	22.29	39.2	32.3725	16.31	41.1125	27.3475	26.06	28.7075	24.6975	115.29	89.315	64.9275	31.35	26.4025	31.3025	276.01	341.233	281.07
2	92	1	0	2	F	51	2.92	34.3575	40.3975	16.44	53.505	24.3425	25.54	40.01	31.815	20.56	38.7375	25.6675	18.5	27.055	24.7975	114.68	85.2475	73.91	31.87	29.8325	34.51	264.17	338.012	294.955
2	93	0.8	0.09691	1	M	58	7.26	33.6975	58.255	25.43	63.9625	39.0825	24.1	36.4125	40.5225	27.09	41.8125	33.49	15.38	28.5	30.8375	142.52	96.57	72.025	27.16	23.9575	27.92	310.39	361.507	331.293
2	94	1	0	0	M	58	6.72	27.0375	49.9375	21.79	55.215	36.675	19.63	37.755	39.94	19.74	36.675	31.01	21.79	33.4825	29.04	123.99	88.175	72.6	26.24	21.1675	28.605	285.01	338.427	317.615
2	95	0.8	0.1	1	F	68	107.73	77.06	40.24	29.8	47.76	27.25	37.11	48.51	38.06	54.22	45.38	36.44	32.17	31.51	31.34	128.64	97.13	78.04	28.98	29.86	31.05	452.86	415.76	310.92
2	96	1	0	0	F	55	7.18	31.0425	51.685	56.09	70.825	30.75	40.54	39.9275	36.9125	49.37	50.195	33.985	31.42	29.1875	27.0675	131.89	97.64	82.2825	33.41	28.4975	29.53	394.01	384.363	316.962
2	97	1	0	1	F	61	35.21	32.94	45.645	22.37	43.2725	20.19	28.08	30.835	28.5125	41.18	53.1375	28.98	17.14	30.3575	27.14	135.3	101.763	83.0775	36.99	30.3225	30.55	345.4	351.87	289.845
2	98	1	0	1	M	64	27.96	25.555	42.345	31.4	65.1175	34.8725	33.04	35.725	37.42	26.33	43.335	32.005	25.37	30.055	27.1625	130.01	89.86	71.0475	38.18	25.83	29.095	347.8	352.47	302.55
2	99	0.8	0.09691	0	F	53	12.27	30.095	48.9825	101.2	84.945	31.3825	31.62	32.9275	34.035	50.54	53.2525	34.985	26.19	28.94	29.0225	124.71	95.455	78.595	30.03	29.515	30.7625	421.46	402.12	317.55
2	100	1	0	0	M	69	51.11	66.8	66.795	43.25	51.74	26.6525	26.86	36.8175	33.2925	54.57	47.3275	29.3025	39.36	36.4125	28.9325	68.9	68.965	62.37	43.79	32.4075	29.9775	354.47	371.963	304.017
2	101	1.2	-0.0791812	0	F	59	11	43.5225	73.46	41.78	56.0475	37.1775	20.99	45.9825	43.535	41.5	49.5075	39.57	12.55	30.7525	31.945	164.3	100.015	76.9325	52.13	33.9275	32.7325	371.72	391.76	363.38
2	102	1	0	1	F	59	37.04	36.415	45.555	25.37	61.9625	27.23	32.82	41.1325	35.44	18.67	50.6875	34.545	36.54	32.2925	27.0475	98.06	85.63	69.9275	41.74	34.65	33.9325	324.08	379.653	304.96
2	103	0.8	0.09691	1	M	55	16.85	29.765	49.0125	17.33	53.5825	27.295	24.84	36.625	34.145	10.31	36.895	29.4925	35.51	38.8775	28.05	87.68	75.4	68.8325	27.83	25.2875	29.2225	253.92	329.467	293.385
2	104	1.2	-0.0791812	0	M	57	33.44	35.1275	47.7825	69.21	66.6325	35.97	34.12	37.42	35.6775	29.6	43.3775	31.6675	35.42	31.38	24.7525	107.27	95.8825	82.03	32.41	27.75	25.26	375.2	370.973	313.795
2	105	0.8	0.09691	2	M	57	54.95	57.6925	58.9325	59.84	47.92	21.9425	32.17	39.5025	33.63	74.46	76.2124	32.5425	36.75	31.1625	29.675	167.37	132.588	83.5075	46.37	35.2275	29.17	506.22	428.053	323.34
