# Supplementary material for: Association between individual retinal layer thickness and visual acuity in patients with epiretinal membrane: a pilot study
Source: PeerJ. 2020 Jul 10;8:e9481. doi: 10.7717/peerj.9481 (PMC7357566; doi:10.7717/peerj.9481)
Supplement: Supplemental Information 2 [file peerj-08-9481-s002.xlsx]

## Sheet: Sheet1
Postoperative	Patient NO.	BCVA	logMAR(BCVA)	RNFL1mm	RNFL3mm	RNFL6mm	GCL1mm	GCL3mm	GCL6mm	IPL1mm	IPL3mm	IPL6mm	INL1mm	INL3mm	INL6mm	OPL1mm	OPL3mm	OPL6mm	ONL1mm	ONL3mm	ONL6mm	PR1mm	PR3mm	PR6mm	Total1mm	Total3mm	Total6mm
0.1	1	0.4	0.4	119.45	82.04	85.05	94.41	82.9	49.47	33.73	42.35	46.31	112.69	132.61	87.38	35.29	31.03	26.18	156.43	123.24	96.73	46.24	36.69	31.44	633.18	558.69	449.88
0.5	24	0.7	0.15	51.55	46.65	42.86	50.13	46.78	26.01	24.39	30.87	28.55	35.94	55.44	38.52	34.01	32.76	29.63	84.05	90.28	78.45	39.5	36.88	34.7	351.14	370.59	305.02
0.4	15	0.6	0.22	16.88	31.5	63.32	63.63	58.28	33.45	32.46	35.33	37.15	57.35	58.24	38.47	35.88	31.97	28.1	110.37	99.22	81.57	30.89	26.72	28.09	372.66	377.74	336.97
0.2	62	0.3	0.52	20.56	26.77	41.84	69.91	69.12	39.22	28.25	34.57	32.57	93.73	87.19	54.7	51.54	49.63	37.75	132.02	102.46	88.82	39.23	34.89	31.75	464.02	432.8	353.14
0.2	63	0.4	0.4	118.14	45.36	34.36	67.42	48.92	27.13	23.39	33.96	35.57	45.93	46.49	37.81	34.01	32.04	24.87	57.8	103.61	98.91	37.32	29.45	24.62	414.4	372.51	315.53
0.3	67	0.4	0.4	24.17	23.67	67.28	41.28	48.6	34.68	27.69	44.05	40.85	117.64	96.61	57.53	39.67	38.4	28.65	159.07	128.64	114.85	39.9	36.66	34.35	485.22	445.97	405.16
0.1	6	1	0	18.91	28.65	46.86	58.34	63.75	30.94	37.57	39.73	35.03	44.47	52.42	37.04	36.46	28.22	24.32	106.42	102.57	84.25	34.76	30.06	31.34	363.37	371.05	315.07
0.4	13	1	0	12.44	21.13	36.42	43.46	53.53	29.73	38.71	39.77	33.13	51.83	52.23	36.67	38.55	40.9	29.81	108.55	83.12	75	38.89	32.92	37.7	360.99	351.62	308.16
0.3	41	0.2	0.7	178.34	103.58	32.07	84.89	73.53	22.74	32.26	30.48	27.05	42.5	80.66	62.08	26.15	35.46	30.7	95.49	110.92	99.52	43.21	41.33	33.25	575.44	507.99	345.79
0.1	3	0.1	1	21.7	32.48	27.62	50.7	50.16	30.91	24.54	28.06	31.59	77.64	68.06	47.23	34.76	36.53	28.69	129.39	118.31	112.24	35.65	28.84	25.54	402.27	396.39	331.39
0.1	42	0.4	0.4	201.13	70.4	48.73	77.58	74.17	34.12	25.45	42.74	43.62	42.15	69.4	47.97	28.47	28.1	29.34	99.07	121.27	99.89	44.3	35.01	29.44	594.35	478.08	368.46
0.8	95	1	0	33.12	30.82	32.06	63.64	47.52	26.69	35.99	35.15	33.45	48.08	43.34	34.7	43.58	36.43	29.9	95.05	95.49	84.42	31.46	30.35	29.26	386.59	355.53	302.49
0.1	25	0.2	0.7	34.71	29.46	28.45	38.94	36.19	21.64	30.76	35.53	31.68	65.45	66.11	42.64	33.09	32.13	26.82	128.68	113.65	100.09	36.58	32.45	27.62	397.4	375.24	309.85
0.1	8	0.4	0.4	206.03	61.13	47.35	84.67	76.8	32.86	23.55	42.44	41.94	42.99	55.5	41.54	28.54	29.29	27.35	93.05	106.76	95.32	45.89	29.86	26.82	557.78	450.05	349.3
0.1	5	1	0	20.43	26.99	47.46	25.4	59.03	30.8	34.06	39.86	33.85	37.75	50.59	33.1	21.08	30.73	25.69	136.23	96.66	76.85	33.44	28.15	31.35	337.23	362.12	305.41
0.6	26	0.6	0.22	21.77	32.88	49.79	94.24	73.13	30.95	31.59	39.7	38.71	52.36	50.91	38.49	48.78	42.69	30.29	114.56	94.35	84.84	38.66	35.2	34.34	436.41	401.24	336.05
0.7	28	0.9	0.05	40.78	28.03	57.28	60.69	51.14	25.52	27.02	39.27	36.24	45.03	53.05	35.14	36.86	33.33	26.12	106.49	96.74	76.32	44.98	33.85	30.69	407.85	371.59	300.6
0.4	19	0.1	1	52.44	31.51	30.48	75.18	44.77	20.72	27.36	35.86	34.04	52.02	55.31	37.19	38.61	31.35	24.06	67.23	93.84	79.66	35.12	25.96	25.88	384.67	355.79	283.99
0.5	23	0.7	0.15	13.49	29.82	48.45	12.22	41.8	24.53	24.58	32.9	29.53	40.14	55.67	31.93	33.34	39.1	25.45	125.03	88.04	78.71	45.15	39.03	33.7	338.38	353.29	303.18
0.5	24	0.7	0.15	43.48	46.59	39.09	32.31	43.94	21.36	16.07	29.6	30.11	43.59	57.08	37.35	11.24	32.72	28.74	101.19	76.3	70.53	43.11	37.67	36.2	319.41	352.79	292.01
0.4	11	0.3	0.52	62.76	31.06	30.63	87.88	44.56	19.08	28.63	36.4	34.26	48.64	49.09	35.03	37.23	33.04	24.25	55.31	87.7	76.48	33.98	25.13	24.45	394.61	344.61	276.68
0.5	10	0.4	0.4	80.75	28.45	29.04	58.04	43.84	19.99	24.65	29.41	27.52	37.6	33.4	29.46	30.31	31.15	26.92	72.16	87.74	75.18	40.37	33.61	32.94	384.07	335.59	273.92
0.4	12	1	0	11.07	19.74	34.21	34.44	45.71	24.12	33.02	37.49	35.32	57.88	55.7	36.43	34.64	31.02	26.98	124.67	106.43	85.29	31.36	27.56	31.82	369.03	367.05	306.77
0.5	37	0.5	0.3	12.47	15.21	30.21	11.78	23.96	35.09	17.24	30.46	35.89	23.72	33.9	35.18	12.53	32.87	30.5	111.46	77.43	76.34	33.26	34	33.09	250.85	276.27	304.08
0.1	2	0.3	0.52	48.92	33.35	37.33	58.33	54.79	28.86	30.66	32.49	37.41	108.25	105.18	65.13	50.17	46.89	34.96	138.04	114.52	97.89	39.97	29.86	25.93	505.87	476.1	381.11
0.3	72	0.7	0.15	11.26	37.03	39.95	21.77	36.6	26.72	35.03	33.67	34.07	42.18	42.95	40.08	33.2	30.26	27.75	33.2	30.26	27.75	27.98	27.6	30.7	306.05	318.54	307.67
0.4	73	0.6	0.22	57.22	59.68	52.16	84.36	70.43	32.88	40.59	42.63	43.74	58.26	91.52	68.53	42.91	37.43	31.13	42.91	37.43	31.13	37.45	38.24	35.98	478.18	496.54	398.38
0.4	58	0.5	0.3	39.12	19.07	41.2	29.94	42.45	34.74	32.35	36.38	41.48	44.12	52.46	37.1	21.39	29.83	26.52	21.39	29.83	26.52	34.61	31.06	29.06	342.4	348.86	330.25
0.1	75	0.2	0.7	92.97	39.02	33.28	75.17	41.09	22.38	24.43	29.08	30.43	55.32	84.57	55.98	36.35	36.01	27.92	36.35	36.01	27.92	42.57	29.47	28.9	442.45	392.45	314.81
0.7	76	1.2	-0.08	14.19	22.99	43.18	63.11	65.58	34.43	30.33	39.86	38.97	49.26	52.34	37.95	31.71	27.81	25.4	31.71	27.81	25.4	35.73	28.64	30.98	359.73	369.1	323.48
0.3	77	0.8	0.1	122.9	47.61	49.16	87.21	66.05	30.49	27.07	33.09	35.85	49.35	62.39	39.35	34.11	37.97	32.96	34.11	37.97	32.96	44.95	32.65	26.87	465.37	407.04	334.06
			0.32±0.28	58.17±55.26	38.15±19.21	42.81±12.65	58.1±23.69	54.17±13.93	29.1±6.4	29.14±5.66	35.91±4.57	35.35±4.81	55.61±22.53	62.92±21.38	43.8±12.74	34.01±9.01	34.42±5.21	28.31±3.06	93.79±38.41	87.7±29.48	76.12±25.66	38.27±4.91	32.25±4.13	30.61±3.52	415.53±86.99	392.68±60.25	328.02±38.66
Preoperative	Patient NO.	BCVA	logMAR(BCVA)	RNFL1mm	RNFL3mm	RNFL6mm	GCL1mm	GCL3mm	GCL6mm	IPL1mm	IPL3mm	IPL6mm	INL1mm	INL3mm	INL6mm	OPL1mm	OPL3mm	OPL6mm	ONL1mm	ONL3mm	ONL6mm	PR1mm	PR3mm	PR6mm	Total1mm	Total3mm	Total6mm
		0.1	1	242.17	168.63	67.42	109.31	63.89	34.05	27.09	45.07	67.54	105.49	98.08	64.71	33.41	38.91	34.97	168.43	184.56	173.29	41.62	39.4	44.78	765.73	678.38	521.18
		0.5	0.3	54.53	31.14	46.75	10.87	30.69	21.27	49.4	55.65	36.33	36.63	61.04	39.13	28.74	31.44	36.44	127.21	82.27	69.51	51.72	42.01	35.18	380.6	365.81	312.07
		0.4	0.4	8.16	40.07	63.39	58.59	82.07	43.14	42.85	44.28	40.73	58.85	74.86	40.29	42.31	31.57	32.53	116.3	90.71	73.51	28.7	23.8	27.82	387.83	413.15	348.3
		0.2	0.7	263.8	172.48	83.59	59.71	63.85	33.04	26.28	34.58	38.55	102.44	98.2	57.68	38.76	35.51	28.33	145.39	129.79	103.67	37.01	35.58	34.23	705.69	604.64	407.7
		0.2	0.7	59.37	42.55	56.75	42.56	44.7	24.41	51.83	61.68	36.17	97.39	86.38	39.4	35.08	29.97	30.69	135.77	109.14	83.16	35.47	30.24	34.1	490.55	438.03	333.43
		0.3	0.52	49.71	60.8	107.73	31.29	50.73	39.83	50.47	63.06	49.97	123.29	117.17	92.66	37.95	39.01	33.88	185.75	139.48	122.72	42.38	35.78	35.93	554.95	524.41	517.25
		0.1	1	148.46	90.12	96.23	105.75	93.91	39.42	38.76	66.49	59.66	87.25	94.68	68.41	37.64	34.84	30.38	122.87	97.07	89.8	33.46	32.1	34.97	611.97	541.75	451.58
		0.4	0.4	18.76	34.45	47.68	40.01	46.86	30.67	60.17	56.89	41.5	55.92	53	39.19	30.8	31.87	28.62	112.13	86.35	71.91	38.24	33.97	33.55	382.95	373.97	324.37
		0.3	0.52	169.63	133.47	73.19	94.15	53.89	21	31.33	37.64	35.89	104.92	105.59	69.42	36.87	39.96	28.84	122.41	124.14	101.91	33.36	34.06	32.93	625.78	564.06	399.46
		0.2	0.7	126.65	119.53	109.02	71.26	53.57	30.31	47.12	50.09	39.74	114	88.54	57.38	34.05	35.04	33.62	180.9	154.12	112.46	50.48	39.38	35.57	655.91	572.91	452.92
		0.1	1	143.99	100.99	28.03	85.84	64.31	30.04	35.52	41.65	58.88	96.94	73.34	64.52	34	45.7	34.75	125.45	133.86	111.71	33.99	34.61	34.93	599.03	504.92	392.2
		0.8	0.1	107.73	77.06	40.24	29.8	47.76	27.25	37.11	48.51	38.06	54.22	45.38	36.44	32.17	31.51	31.34	128.64	97.13	78.04	28.98	29.86	31.05	452.86	415.76	310.92
		0.1	1	97.93	64.54	50.17	77.83	48.12	24.12	62.06	56.32	41.11	117.18	86.95	38.88	28.5	32.63	28.94	116.52	112.2	82.76	25.89	28.53	28.04	557.38	459.72	322.89
		0.1	1	56.9	81.15	97.48	74.38	71.17	41.56	78.32	71.27	49.39	86.36	82.39	64.98	29.05	32.06	30.93	141.45	138.75	103.13	40.66	40.88	33.87	549.63	559.33	455.18
		0.1	1	8.38	26.45	43.81	44	58.2	34.95	40.13	42.03	36.06	43.55	52.59	36.01	41.65	29.17	23.37	107.97	104.06	86.49	35.5	34.23	33.16	347.93	378.22	322.3
		0.6	0.22	19.96	48.93	62.08	97.72	85.47	39.64	36.64	43.22	40.44	69.57	59.16	44	48.8	41.5	33.58	117.38	97.94	85.61	37.28	35.21	32.88	459.95	442.19	367.67
		0.7	0.15	53.34	74.17	61.97	80.47	65.84	29.85	35.86	43.83	37.09	47.05	64.81	35.42	45.27	35.8	28.91	116.87	88.15	69.17	33.58	29.93	30.8	452.49	440.29	322.54
		0.4	0.4	61.86	62.58	71.15	86.91	86.78	49.75	42.14	37.82	36.49	90.29	85.87	45.8	36.08	29.87	29.17	147.56	106.84	79.05	35.77	33.13	31.02	542.9	478.64	357.15
		0.5	0.3	51.57	51.17	70.65	72.56	58.37	39.39	40.37	42.03	34.95	83.7	61.55	32.9	31.21	29.28	23.87	81.17	83.31	69.05	29.63	30.11	30.24	419.73	394.32	326.24
		0.5	0.3	54.53	31.14	46.75	10.87	30.69	21.27	49.4	55.65	36.33	62.63	61.04	49.13	28.74	31.44	29.44	127.21	82.27	69.51	51.72	42.01	35.18	409.6	365.81	315.07
		0.4	0.4	18.4	47.61	76.27	87.41	50.69	29.96	52.12	83.69	41.39	102.04	82.46	44.54	30.84	31.82	29.36	119.16	92.98	75.6	33.78	26.92	28.54	484.53	451.68	351.66
		0.5	0.3	65.63	39.32	44.94	14.22	46.68	24.26	39.64	53.79	37.44	27.33	60.3	34.82	31.26	27.8	26.4	123.72	104.8	76.38	34.92	28.41	29.96	378.75	404.28	308.74
		0.4	0.4	14.7	46.53	53.51	91.18	54.74	24.98	58.12	64.65	44.41	78.91	71.63	42.16	32.63	33.64	36.5	130.69	119.12	78.66	33.74	29.56	30.87	477.13	438.06	344.95
		0.5	0.3	17.78	41.87	59.28	45.43	52.38	30.95	68.6	58.36	45.65	57	56.32	39.46	39.82	30.78	27.35	128.36	106.96	86.82	35.52	27.76	30.12	436.11	414.1	352.42
		0.1	1	51.15	164.49	63.91	63.68	80.52	35.84	29.81	36.49	47.13	49.29	92.82	73.04	31.56	40.83	31.76	161.77	150.24	101.55	44.41	39.27	34.98	734.87	643.24	425.02
		0.3	0.52	43.65	51.73	50.21	23.67	38.8	26.98	29.28	38.33	39.11	81.6	75.27	44.9	36.65	33.04	33.17	146.71	123.49	102.31	35.94	31.13	31.52	530.34	497.9	389.68
		0.4	0.4	57.32	59.88	53.16	84.36	70.44	32.88	40.59	42.65	43.74	78.26	93.52	68.53	42.91	37.43	31.13	127.87	126.36	104.58	37.46	38.24	35.98	498.18	495.39	398.38
		0.4	0.4	12.47	15.21	30.21	17.24	30.46	35.89	23.72	33.9	35.18	12.53	32.87	30.5	12.53	32.87	30.5	111.46	77.43	76.34	33.26	34	33.09	250.85	274.7	283.76
		0.1	1	110.61	44.41	53.55	75.67	54.81	29.15	34.04	39.33	31.9	119.86	98.55	51.21	35.46	36.1	28.23	123.93	106.76	88.22	36.1	30.45	25.11	564.14	429.63	337.02
		0.7	0.52	142	88.02	71.31	86.78	63.45	39.22	24.36	31.28	38.84	56.93	81.75	51.51	30.17	31.94	28.01	161.35	126.72	99.81	39.77	34.03	32.8	571.09	650.16	390.91
		0.3	0.15	29.53	27.99	48.14	69.74	67.39	37.62	26.75	36.93	37.75	50.81	52.51	39.9	33.79	28.65	25.14	95.41	97.06	88.35	39.46	30.98	30.76	373.24	373.5	340.71
			0.55±0.3	76.15±64.52	68.98±42.09	62.21±20.05	62.69±28.89	58.43±16.08	32.34±7.05	42.25±13.22	48.94±12.35	41.85±7.9	75.88±28.47	75.76±19.47	49.58±14.61	34.47±6.44	33.93±4.22	30.33±3.29	130.9±22.65	112.07±24.37	90.81±20.86	37.09±6.11	33.41±4.57	32.71±3.45	504.93±118.14	470.61±94.04	370.44±59.5
