# Supplementary material for: Association between individual retinal layer thickness and visual acuity in patients with epiretinal membrane: a pilot study
Source: PeerJ. 2020 Jul 10;8:e9481. doi: 10.7717/peerj.9481 (PMC7357566; doi:10.7717/peerj.9481)
Supplement: Supplemental Information 3 [file peerj-08-9481-s003.xlsx]

## Sheet: Sheet1
Postoperative	Patient NO.	logMAR(BCVA)	RNFL1mm	RNFL3mm	RNFL6mm	GCL1mm	GCL3mm	GCL6mm	IPL1mm	IPL3mm	IPL6mm	INL1mm	INL3mm	INL6mm	OPL1mm	OPL3mm	OPL6mm	ONL1mm	ONL3mm	ONL6mm	PR1mm	PR3mm	PR6mm	Total1mm	Total3mm	Total6mm
	1	0.4	119.45	82.04	85.05	94.41	82.9	49.47	33.73	42.35	46.31	112.69	132.61	87.38	35.29	31.03	26.18	156.43	123.24	96.73	46.24	36.69	31.44	633.18	558.69	449.88
	24	0.15	51.55	46.65	42.86	50.13	46.78	26.01	24.39	30.87	28.55	35.94	55.44	38.52	34.01	32.76	29.63	84.05	90.28	78.45	39.5	36.88	34.7	351.14	370.59	305.02
	15	0.22	16.88	31.5	63.32	63.63	58.28	33.45	32.46	35.33	37.15	57.35	58.24	38.47	35.88	31.97	28.1	110.37	99.22	81.57	30.89	26.72	28.09	372.66	377.74	336.97
	63	0.4	118.14	45.36	34.36	67.42	48.92	27.13	23.39	33.96	35.57	45.93	46.49	37.81	34.01	32.04	24.87	57.8	103.61	98.91	37.32	29.45	24.62	414.4	372.51	315.53
	13	0	12.44	21.13	36.42	43.46	53.53	29.73	38.71	39.77	33.13	51.83	52.23	36.67	38.55	40.9	29.81	108.55	83.12	75	38.89	32.92	37.7	360.99	351.62	308.16
	42	0.4	201.13	70.4	48.73	77.58	74.17	34.12	25.45	42.74	43.62	42.15	69.4	47.97	28.47	28.1	29.34	99.07	121.27	99.89	44.3	35.01	29.44	594.35	478.08	368.46
	8	0.4	206.03	61.13	47.35	84.67	76.8	32.86	23.55	42.44	41.94	42.99	55.5	41.54	28.54	29.29	27.35	93.05	106.76	95.32	45.89	29.86	25.82	557.78	450.05	349.3
	5	0	20.43	26.99	47.46	25.4	59.03	30.8	34.06	39.86	33.85	37.75	50.59	33.1	21.08	30.73	25.69	136.23	96.66	76.85	33.44	28.15	31.35	337.23	362.12	305.41
	28	0.05	40.78	28.03	57.28	60.69	51.14	25.52	27.02	39.27	36.24	45.03	53.05	35.14	36.86	33.33	26.12	106.49	96.74	76.32	44.98	33.85	30.69	407.85	371.59	300.6
	23	0.15	13.49	29.82	48.45	12.22	41.8	24.53	24.58	32.9	29.53	40.14	55.67	31.93	33.34	39.1	25.45	125.03	88.04	78.71	45.15	39.03	33.7	338.38	353.29	303.18
	24	0.15	43.48	46.59	39.09	32.31	43.94	21.36	16.07	29.6	30.11	43.59	57.08	37.35	11.24	32.72	28.74	101.19	76.3	70.53	43.11	37.67	36.2	319.41	352.79	292.01
	12	0	11.07	19.74	34.21	34.44	45.71	24.12	33.02	37.49	35.32	57.88	55.7	36.43	34.64	31.02	26.98	124.67	106.43	85.29	31.36	27.56	31.82	369.03	367.05	306.77
	2	0.52	48.92	33.35	37.33	58.33	54.79	28.86	30.66	32.49	37.41	108.25	105.18	65.13	50.17	46.89	34.96	138.04	114.52	97.89	39.97	29.86	25.93	505.87	476.1	381.11
	72	0.15	11.26	37.03	39.95	21.77	36.6	26.72	35.03	33.67	34.07	42.18	42.95	40.08	33.2	30.26	27.75	33.2	30.26	27.75	27.98	27.6	30.7	306.05	318.54	307.67
	73	0.22	57.22	59.68	52.16	84.36	70.43	32.88	40.59	42.63	43.74	58.26	91.52	68.53	42.91	37.43	31.13	42.91	37.43	31.13	37.45	38.24	35.98	478.18	496.54	398.38
	76	-0.08	14.19	22.99	43.18	63.11	65.58	34.43	30.33	39.86	38.97	49.26	52.34	37.95	31.71	27.81	25.4	31.71	27.81	25.4	35.73	28.64	30.98	359.73	369.1	323.48
	77	0.1	122.9	47.61	49.16	87.21	66.05	30.49	27.07	33.09	35.85	49.35	62.39	39.35	34.11	37.97	32.96	34.11	37.97	32.96	44.95	32.65	26.87	465.37	407.04	334.06
Preoperative	Patient NO.	logMAR(BCVA)	RNFL1mm	RNFL3mm	RNFL6mm	GCL1mm	GCL3mm	GCL6mm	IPL1mm	IPL3mm	IPL6mm	INL1mm	INL3mm	INL6mm	OPL1mm	OPL3mm	OPL6mm	ONL1mm	ONL3mm	ONL6mm	PR1mm	PR3mm	PR6mm	Total1mm	Total3mm	Total6mm
	1	1	242.17	168.63	67.42	109.31	63.89	34.05	27.09	45.07	67.54	105.49	98.08	64.71	33.41	38.91	34.97	168.43	184.56	173.29	41.62	39.4	44.78	765.73	678.38	521.18
	24	0.3	54.53	31.14	46.75	10.87	30.69	21.27	49.4	55.65	36.33	36.63	61.04	39.13	28.74	31.44	36.44	127.21	82.27	69.51	51.72	42.01	35.18	380.6	365.81	312.07
	15	0.4	8.16	40.07	63.39	58.59	82.07	43.14	42.85	44.28	40.73	58.85	74.86	40.29	42.31	31.57	32.53	116.3	90.71	73.51	28.7	23.8	27.82	387.83	413.15	348.3
	63	0.7	59.37	42.55	56.75	42.56	44.7	24.41	51.83	61.68	36.17	97.39	86.38	39.4	35.08	29.97	30.69	135.77	109.14	83.16	35.47	30.24	34.1	490.55	438.03	333.43
	13	0.4	18.76	34.45	47.68	40.01	46.86	30.67	60.17	56.89	41.5	55.92	53	39.19	30.8	31.87	28.62	112.13	86.35	71.91	38.24	33.97	33.55	382.95	373.97	324.37
	42	1	143.99	100.99	28.03	85.84	64.31	30.04	35.52	41.65	58.88	96.94	73.34	64.52	34	45.7	34.75	125.45	133.86	111.71	33.99	34.61	34.93	599.03	504.92	392.2
	8	1	56.9	81.15	97.48	74.38	71.17	41.56	78.32	71.27	49.39	86.36	82.39	64.98	29.05	32.06	30.93	141.45	138.75	103.13	40.66	40.88	33.87	549.63	559.33	455.18
	5	1	8.38	26.45	43.81	44	58.2	34.95	40.13	42.03	36.06	43.55	52.59	36.01	41.65	29.17	23.37	107.97	104.06	86.49	35.5	34.23	33.16	347.93	378.22	322.3
	28	0.15	53.34	74.17	61.97	80.47	65.84	29.85	35.86	43.83	37.09	47.05	64.81	35.42	45.27	35.8	28.91	116.87	88.15	69.17	33.58	29.93	30.8	452.49	440.29	322.54
	23	0.3	51.57	51.17	70.65	72.56	58.37	39.39	40.37	42.03	34.95	83.7	61.55	32.9	31.21	29.28	23.87	81.17	83.31	69.05	29.63	30.11	30.24	419.73	394.32	326.24
	24	0.3	54.53	31.14	46.75	10.87	30.69	21.27	49.4	55.65	36.33	62.63	61.04	49.13	28.74	31.44	29.44	127.21	82.27	69.51	51.72	42.01	35.18	409.6	365.81	315.07
	12	0.4	14.7	46.53	53.51	91.18	54.74	24.98	58.12	64.65	44.41	78.91	71.63	42.16	32.63	33.64	36.5	130.69	119.12	78.66	33.74	29.56	30.87	477.13	438.06	344.95
	2	1	51.15	164.49	63.91	63.68	80.52	35.84	29.81	36.49	47.13	49.29	92.82	73.04	31.56	40.83	31.76	161.77	150.24	101.55	44.41	39.27	34.98	734.87	643.24	425.02
	72	0.52	43.65	51.73	50.21	23.67	38.8	26.98	29.28	38.33	39.11	81.6	75.27	44.9	36.65	33.04	33.17	146.71	123.49	102.31	35.94	31.13	31.52	530.34	497.9	389.68
	73	0.4	57.32	59.88	53.16	84.36	70.44	32.88	40.59	42.65	43.74	78.26	93.52	68.53	42.91	37.43	31.13	127.87	126.36	104.58	37.46	38.24	35.98	498.18	495.39	398.38
	76	0.52	142	88.02	71.31	86.78	63.45	39.22	24.36	31.28	38.84	56.93	81.75	51.51	30.17	31.94	28.01	161.35	126.72	99.81	39.77	34.03	32.8	571.09	650.16	390.91
	77	0.15	29.53	27.99	48.14	69.74	67.39	37.62	26.75	36.93	37.75	50.81	52.51	39.9	33.79	28.65	25.14	95.41	97.06	88.35	39.46	30.98	30.76	373.24	373.5	340.71
